# Supplementary material
Source: publisher figshare collection journal article supplement (https://tandf.figshare.com/articles/dataset/_/7200512)
Supplement: Supplementary file 1 [file 1]

# Supplementary Materials: New Mechanistic Insights into the Claisen Rearrangement of Chorismate - A Unified Reaction Valley Approach Study

Marek Freindorf, Yuwen Tao, Daniel Sethio, Dieter Cremer,<sup>†</sup> Elfi Kraka<sup>a</sup>

<sup>a</sup> Computational and Theoretical Chemistry Group (CATCO), Department of Chemistry, Southern Methodist University, 3215 Daniel Ave, Dallas, Texas 75275-0314, USA

## ARTICLE HISTORY

Compiled August 12, 2018

## Contents

|          |                             |          |
|----------|-----------------------------|----------|
| <b>1</b> | <b>Puckering parameters</b> | <b>2</b> |
| <b>2</b> | <b>Figure S1</b>            | <b>2</b> |
| <b>3</b> | <b>Figure S2</b>            | <b>3</b> |
| <b>4</b> | <b>Figure S3</b>            | <b>4</b> |
| <b>5</b> | <b>Table T1</b>             | <b>4</b> |
| <b>6</b> | <b>Figure S4</b>            | <b>4</b> |

---

<sup>†</sup>In memoriam

## 1. Puckering parameters

For 6-membered rings the puckering analysis is based on the puckering amplitudes  $q_2$  and  $q_3$ , the pseudo-rotation phase angle  $\Phi_2$ , the hyperspherical angle  $\Theta$ , and the total puckering amplitude  $Q$ . These parameters can be divided into the pseudo-rotational coordinate pair  $(q_2, \Phi_2)$  describing the pseudo-rotation of boat and twistboat forms, and the crown puckering amplitude  $q_3$ , which describes the chair conformer. According to the Cremer-Pople puckering model, the percentage of the chair, boat, and twist-boat are derived from the formulas:

$$Chair : 100\% \frac{q_3^2}{Q^2}$$

$$Boat : 100\% \frac{q_2^2}{Q^2} \cos^2(3\Phi_2)$$

$$TwistBoat : 100\% [1 - \cos^2(3\Phi_2)] \frac{q_2^2}{Q^2}$$

## 2. Figure S1

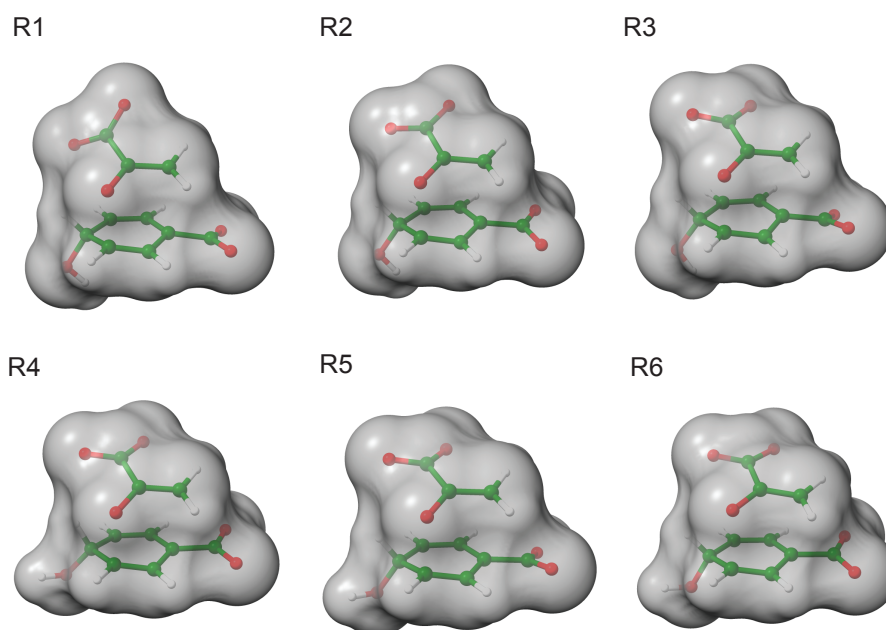

**Figure S1.** Connolly surface of TS for the reactions **R1** - **R6**.

3. Figure S2

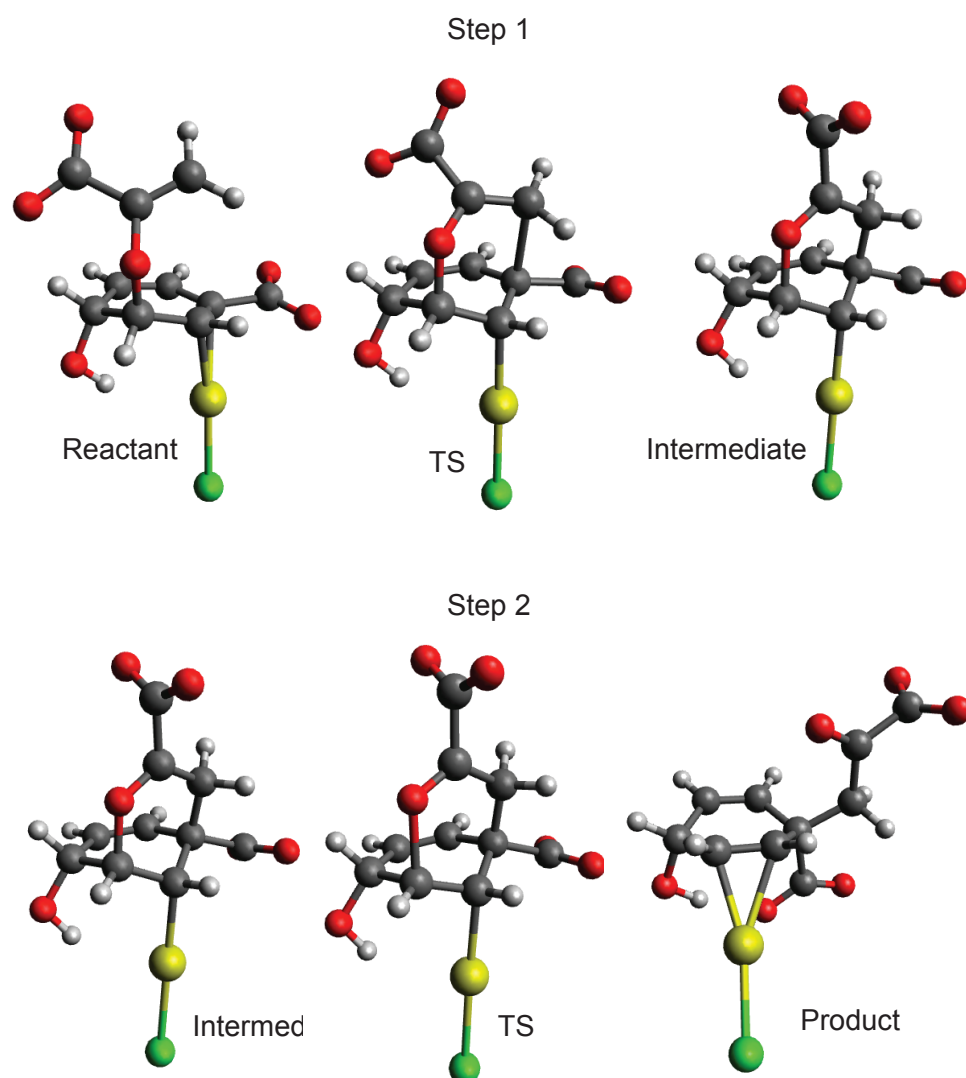

**Figure S2.** The reactant, intermediate, and TS of the reaction **R7** for Step 1 and Step 2.

#### 4. Figure S3

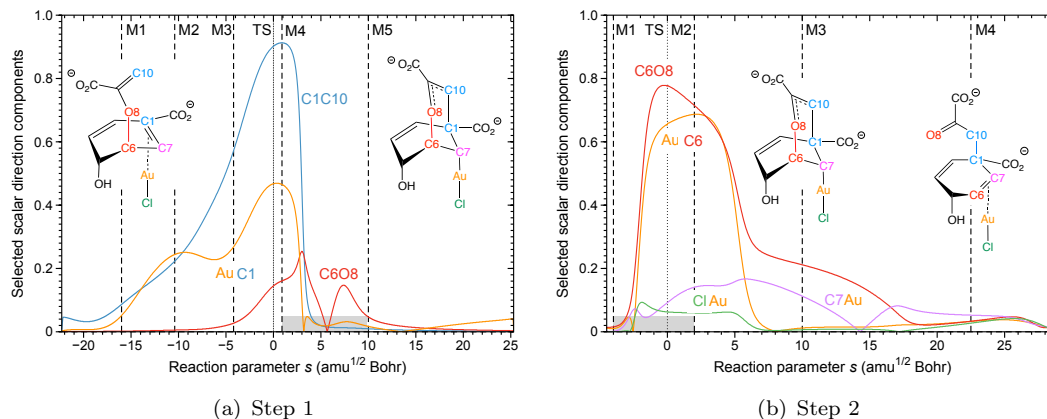

**Figure S3.** Components of the unit reaction path direction vector  $\eta(s)$  as a function of the reaction path parameter  $s$  for the reactions **R7**. The borders of the reaction phases are indicated by vertical dashed lines at curvature points M1, M2, M3, etc. The TS at  $s = 0 \text{ amu}^{1/2} \text{ Bohr}$  is also indicated by a vertical dotted line.

#### 5. Table T1

**Table S1.** Puckering parameters of the pyran ring and the hexadienyl ring for Step 1 and Step 2 of the Au(I) catalyzed reaction **R7**.

| Reaction                    | q <sub>2</sub><br>(Å) | q <sub>3</sub><br>(Å) | φ <sub>2</sub><br>(Deg) | Q<br>(Å) | Chair<br>(%) | Boat<br>(%) | Tboat<br>(%) |
|-----------------------------|-----------------------|-----------------------|-------------------------|----------|--------------|-------------|--------------|
| <i>Pyran Ring</i>           |                       |                       |                         |          |              |             |              |
| Chorismate                  | 0.155                 | -0.734                | 308                     | 0.75     | 95.7         | 3.6         | 0.6          |
| TS1                         | 0.261                 | -0.621                | 299                     | 0.674    | 85           | 14.9        | 0.1          |
| Intermediate                | 0.415                 | -0.364                | 341                     | 0.552    | 43.4         | 16.6        | 40           |
| TS2                         | 0.425                 | -0.363                | 339.5                   | 0.56     | 42           | 13.2        | 44.7         |
| Prephenate                  | 0.448                 | -0.378                | 334                     | 0.586    | 41.6         | 2.5         | 56           |
| <i>Cyclohexadienyl Ring</i> |                       |                       |                         |          |              |             |              |
| Chorismate                  | 0.193                 | 0.132                 | 150                     | 0.234    | 32.1         | 0           | 67.9         |
| TS1                         | 0.331                 | 0.26                  | 84                      | 0.42     | 38.1         | 6.7         | 55.2         |
| Intermediate                | 0.395                 | 0.306                 | 66                      | 0.5      | 37.6         | 55.8        | 6.7          |
| TS2                         | 0.343                 | 0.231                 | 57                      | 0.414    | 31.1         | 66.7        | 2.2          |
| Prephenate                  | 0.411                 | 0.008                 | 182                     | 0.411    | 0            | 98.8        | 1.2          |

## 6. Figure S4

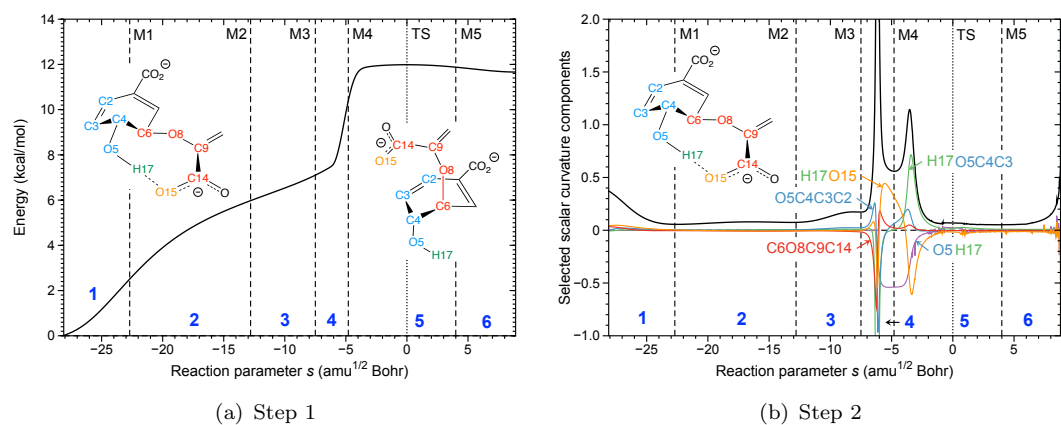

**Figure S4.** (a) Energy profile, and (b) decomposition of the curvature into components as a function of the reaction parameter  $s$  for the reaction **1a**  $\rightarrow$  **1b**. The borders of the reaction phases are indicated by vertical dashed lines at curvature points M1, M2, M3, etc. The TS at  $s = 0 \text{ amu}^{1/2} \text{ Bohr}$  is also indicated by a vertical dotted line.
